# Supplementary material
Source: publisher figshare collection journal article supplement (https://acs.figshare.com/ndownloader/files/12255026)
Supplement: Supplementary file 1 [file 12255026]

## Sheet: Table S7.
			I.D #	Rboswitch	N-terminal Sequence	OFF	OFF S.D	ON	ON S.D	Fold Change	Fold Change S.D	Log(OFF)	Log(ON)	LOG(Fold Change)	16s rRNA ΔG	JCAT CAI 4-18 nt	GC content (4-18 nt)	tAI (first 21 nt)	Codon Frequency	ΔG 4-18 nt	Translation initiation rate	ΔG_full	ΔG_trunc	ΔΔG
			1	ORS	GGTAGCTCCCATCAC	122.1	29.2984	332.7	15.7016	2.81	0.142987	2.0789	2.52175	0.442855	-3.41	0.77	60	0.172	1.52	-0.6	599.5	-337.7	-305.3	32.4
			2	ORS	GGCTCCTCCCACCAT	229.3	21.7399	492.7	10.4625	2.16	1.42526	2.359	2.69251	0.333504	-3.34	0.76	66.7	0.2222	1.46	-0.3	1146.2	-333.8	-305.8	28
			3	ORS	GGGAGCTCCCATCAC	116.5	26.689	534.4	40.773	4.69	0.173243	2.05897	2.72707	0.668098	-3.47	0.27	67.7	0.1507	1.14	-4.2	754.2	-340.7	-305.4	35.3
			4	ORS	GGCTCGTCGCACCAT	276.9	22.6613	554.8	62.3351	2	0.262839	2.44128	2.74224	0.300967	-3.42	0.15	66.7	0.1571	1.38	-0.5	898.9	-332.4	-307.6	24.8
			5	ORS	GGCTCGTCGCACCAC	401.7	35.4743	643.7	19.3958	1.61	1.7702	2.60279	2.80855	0.205755	-3.4	0.15	73.3	0.1571	1.36	-0.5	1300.2	-331.6	-306.1	25.5
			6	ORS	GGCAGCTCCCACCAC	282.7	26.454	733.4	102.158	2.59	0.200719	2.44999	2.86233	0.412348	-3.42	0.69	73.3	0.1869	1.54	-0.3	1335.7	-337.7	-305.2	32.5
			7	ORS	GGAAGCTCCCACCAC	205.1	11.5047	900.9	38.6364	4.4	0.0597281	2.31153	2.9544	0.642862	-3.42	0.19	67.7	0.1571	1.08	-1.1	855.5	-341.2	-304.6	36.6
			8	ORS	GGCTCCAGCCACCAC	392.4	22.5844	995	26.4926	2.54	0.535842	2.59326	2.99772	0.404455	-3.38	0.69	73.3	0.1869	1.54	-3.8	1317.8	-332	-306.6	25.4
			9	ORS	GGAAGCTCCCACCAT	197.1	52.9156	1041.6	37.6206	5.54	0.0462675	2.28456	3.01753	0.732966	-3.42	0.19	60	0.1571	1.1	-1.1	792.5	-341.6	-306.5	35.1
			10	ORS	GGTTCGTCGCATCAC	736.3	33.5412	1124.8	40.6085	1.53	0.560941	2.86674	3.05089	0.184149	-1.92	0.17	60	0.1446	1.34	0	1429	-330.1	-304	26.1
			11	ORS	GGAAGCTCACACCAT	270.8	39.8165	1151.5	72.802	4.3	0.28389	2.42946	3.06068	0.631214	-3.35	0.09	53.3	0.1321	1.04	0	927.7	-338.2	-305	33.2
			12	ORS	GGTAGTTCCCACCAC	513.2	38.7539	1339.5	25.4684	2.62	0.184807	2.70949	3.12689	0.417394	-3.42	0.35	60	0.172	1.34	-1.5	936.1	-335.3	-304	31.3
			13	AddA	GGTAGTAGTCACCAC	865.1	42.3696	1348.4	95.6045	1.56	0.0491598	2.93673	3.12912	0.192388	-3.38	0.15	53.3	0.165	1.28	-1.5	2020.9	-330.8	-305	25.8
			14	AddA	GGGAGCAGCCACCAT	933	29.7169	1552.6	22.2905	1.67	0.0726038	2.96976	3.19104	0.221279	-3.8	0.24	66.7	0.1111	1.1	-1.8	714.6	-332.2	-307.4	24.8
			15	ORS	GGAAGCTCTCATCAC	263.8	11.9601	1596.5	23.198	6.06	0.52665	2.42094	3.20313	0.782185	-2.81	0.21	53.3	0.172	1.1	0	1360	-339.3	-305	34.3
			16	ORS	GGGAGCAGTCATCAC	556.5	13.4209	1685.3	73.7951	3.03	0.0824151	2.74537	3.2264	0.481028	-4.59	0.11	60	0.1446	1.08	0	847.8	-333	-305.4	27.6
			17	AddA	GGTAGCAGCCACCAC	838.4	13.4603	2194.8	40.4289	2.62	0.0545015	2.9234	3.34134	0.417937	-3.4	0.69	66.7	0.1268	1.6	-2.4	1010.5	-333	-308.4	24.6
			18	AddA	GGCAGCAGCCATCAT	1869.1	161.062	2209.6	145.215	1.18	0.0957934	3.27059	3.3437	0.0731033	-3.39	0.62	60	0.1793	1.68	-4.3	1846.9	-333.9	-310.5	23.4
			19	ORS	GGGAGCAGCCATCAT	688.3	59.438	2260.7	112.487	3.3	0.0234054	2.83674	3.35388	0.517137	-5.04	0.24	60	0.1268	1.26	-1.8	1967	-332.7	-307	25.7
			20	AddA	GGGAGCAGTCATCAT	2627.1	69.7201	2583.6	53.5759	0.98	0.0422358	3.41938	3.41217	-0.00721124	-4.57	0.11	53.3	0.1446	1.1	0	1967	-328.9	-304.3	24.6
			21	AddA	GGTAGTAGCCATCAC	1259.9	43.3385	2777.8	76.625	2.21	0.0161203	3.10017	3.44358	0.343416	-3.37	0.32	53.3	0.165	1.46	-2.4	1188.2	-330.2	-306.4	23.8
			22	ORS	GGGAGTAGCCATCAT	1049.2	28.6472	2842.5	38.5557	2.71	0.0399995	3.02074	3.45367	0.432929	-5.29	0.11	53.3	0.1446	1.1	-1.8	1967	-331.3	-305.2	26.1
			23	AddA	GGTAGCAGCCACCAT	1325.4	33.176	2900.4	15.3291	2.19	0.185299	3.12227	3.46246	0.340188	-3.42	0.69	60	0.1268	1.62	-2.4	1672.8	-331.6	-308.1	23.5
			24	ORS	GGGAGCAGTCATCAT	755.1	43.1606	2971	78.0937	3.94	0.048893	2.87752	3.47281	0.595283	-4.57	0.11	53.3	0.1446	1.26	0	1967	-332.1	-304.3	27.8
			25	ORS	GGCAGCAGCCATCAT	1833.3	88.1732	3096	142.762	1.69	0.0464661	3.26289	3.4905	0.227607	-3.39	0.62	60	0.1793	1.68	-4.3	1846.9	-335.6	-310.5	25.1
			26	AddA	GGTAGTAGCCACCAC	832	22.2163	3104.1	36.7847	3.73	0.179871	2.92	3.49191	0.571909	-3.43	0.32	60	0.1446	1.44	-2.4	1188.2	-333	-306.4	26.6
			27	ORS	GGTAGCTCTCATCAT	674.3	31.1558	3184	48.2274	4.73	0.541552	2.82852	3.50294	0.674421	-1.6	0.83	46.7	0.165	1.56	0	1220.8	-333.6	-305.2	28.4
			28	AddA	GGTAGCAGTCATCAC	2883.6	92.414	3340.2	98.6942	1.16	0.0781855	3.45979	3.52365	0.0638541	-2.32	0.32	53.3	0.165	1.46	0	2201.3	-328.2	-305.7	22.5
			29	AddA	GGCAGTAGCCACCAT	2378.6	4.17909	3878.8	94.1705	1.63	0.0814692	3.37633	3.58861	0.212282	-3.39	0.29	60	0.1793	1.5	-4.3	1846.2	-331.5	-308.1	23.4
			30	ORS	GGGAGCAGTCATCAT	754.7	70.7034	4469	171.869	5.95	0.00352432	2.87649	3.65	0.773512	-4.57	0.11	53.3	0.1446	1.1	0	1967	-332.1	-304.3	27.8
			31	AddA	GGTAGCAGTCACCAT	3489.4	68.8108	4535.6	155.472	1.3	0.0642339	3.5427	3.65647	0.113773	-3.39	0.32	53.3	0.1446	1.46	-1.5	2211.2	-328.8	-305.4	23.4
			32	ORS	GGAAGTAGCCATCAC	642.3	31.2733	4808.8	122.889	7.5	0.659356	2.80741	3.68194	0.874528	-3.44	0.08	53.3	0.172	1.04	-0.9	1563.6	-334.4	-305	29.4
			33	AddA	GGTAGCAGCCATCAT	2809.5	83.8222	4899.5	124.656	1.74	0.0579209	3.4485	3.69006	0.241567	-3.4	0.69	53.3	0.1446	1.64	-2.4	1703	-331.9	-308.5	23.4
			34	ORS	GGGAGTTCTCATCAT	740.9	6.00337	4914.6	218.796	6.63	0.239118	2.86978	3.6912	0.821428	-2.57	0.14	46.7	0.165	1.02	-1.2	1838.6	-334.2	-305.1	29.1
			35	ORS	GGGAGTTCACACCAT	678.9	62.858	5394.2	170.669	7.98	0.466078	2.8305	3.73178	0.901277	-5.64	0.06	53.3	0.1268	0.92	-1.1	2441.3	-335.3	-305	30.3
			36	ORS	GGAAGCAGTCATCAT	459.1	47.8172	7231.6	118.054	15.87	0.304573	2.66037	3.8592	1.19883	-2.37	0.08	46.7	0.172	1.06	0	2333.9	-332.6	-302.9	29.7
			37	ORS	GGTTCAAGTCACCAT	5376.3	310.863	10962.9	239.572	2.04	0.229744	3.72999	4.03986	0.309868	-3.38	0.16	46.7	0.1446	1.3	-1.3	2211.2	-329.8	-305	24.8
				Sequence
			AddA	GCTTCATATAATCCTAATGATATGGTTTGGGAGTTTCTACCAAGAGCCTTAAACTCTTGATTATGAAGTCTGTCGCTTTATCCGAAATTTTATAAAGAGAAGACT
			ORS	GCTTCATATAATCCGAATGATATGGTTTCGGAGCTTCCACCAAGAGCCTTAAACTCTTGATTATGAAGTCTGTCGCTTTATCCGAAATTTTATAAAGAGAAGACT
			linker-eGFP	CATCATCATCACAGCAGCGGCCTGGTGCCGCGCGGCAGCCATATGGTGAGCAAGGGCGAGGAGCTGTTCACCGGGGTGGTGCCCATCCTGGTCGAGCTGGACGGCGACGTAAACGGCCACAAGTTCAGCGTGTCCGGCGAGGGCGAGGGCGATGCCACCTACGGCAAGCTGACCCTGAAGTTCATCTGCACCACCGGCAAGCTGCCCGTGCCCTGGCCCACCCTCGTGACCACCCTGACCTACGGCGTGCAGTGCTTCAGCCGCTACCCCGACCACATGAAGCAGCACGACTTCTTCAAGTCCGCCATGCCCGAAGGCTACGTCCAGGAGCGCACCATCTTCTTCAAGGACGACGGCAACTACAAGACCCGCGCCGAGGTGAAGTTCGAGGGCGACACC…
			3' UTR	GGATCCGGCTGCTAACAAAGCCCGAAAGGAAGCTGAGTTGGCTGCTGCCACCGCTGAGCAATAA
